# Supplementary material for: Substrate structure and computation guided engineering of a lipase for omega-3 fatty acid selectivity
Source: PubMed Central journal article supplement (PMC7145112; doi:10.1371/journal.pone.0231177), 2020-04-09
Supplement: pone.0231177.s001.pdf [file pone.0231177.s001.pdf]

**Supplementary materials**  
**Substrate structure and computation guided engineering of a Lipase**  
**for Omega-3 fatty acid selectivity**

Tushar Ranjan Moharana and Nalam Madhusudhana Rao\*  
CSIR-Centre for Cellular and Molecular Biology  
Uppal Road  
Hyderabad India 500007

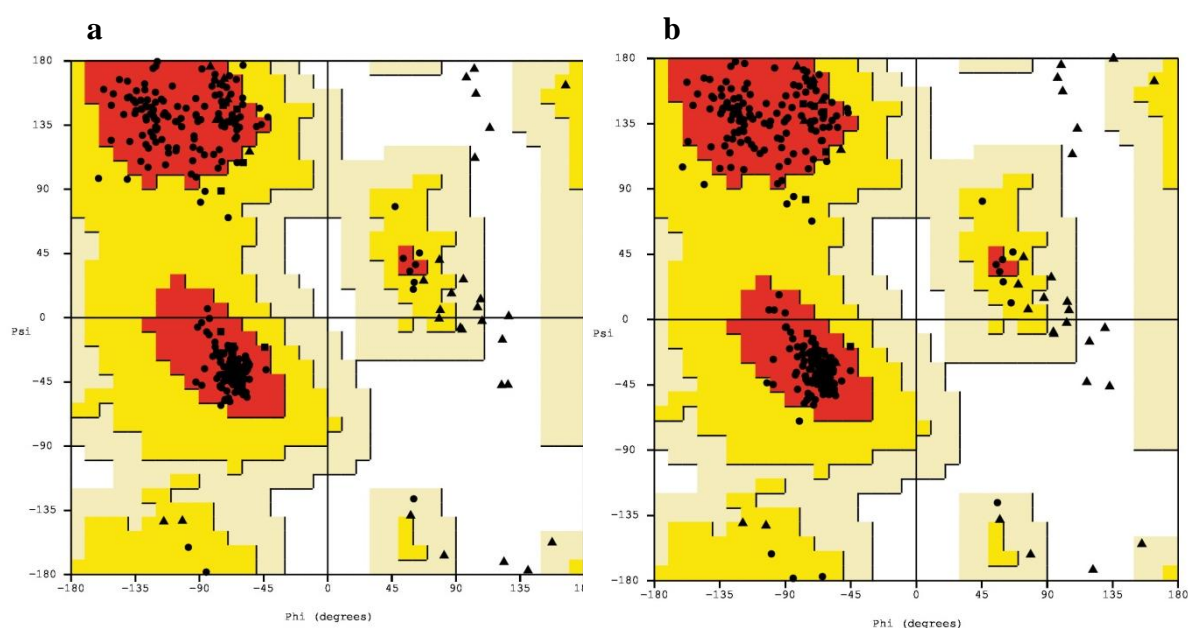

**Figure S1: Ramachandran plot of modelled GTL (a) and DM-GTL (b) in lid open conformation.**

Triangle represents glycine and square represents proline. Other amino acids are represented by circle. Red colour indicates most favoured region, deep yellow indicates additional allowed region and light yellow indicates generously allowed region.
