# Supplementary material for: Substrate structure and computation guided engineering of a lipase for omega-3 fatty acid selectivity
Source: PubMed Central journal article supplement (PMC7145112; doi:10.1371/journal.pone.0231177), 2020-04-09
Supplement: pone.0231177.s003.pdf [file pone.0231177.s003.pdf]

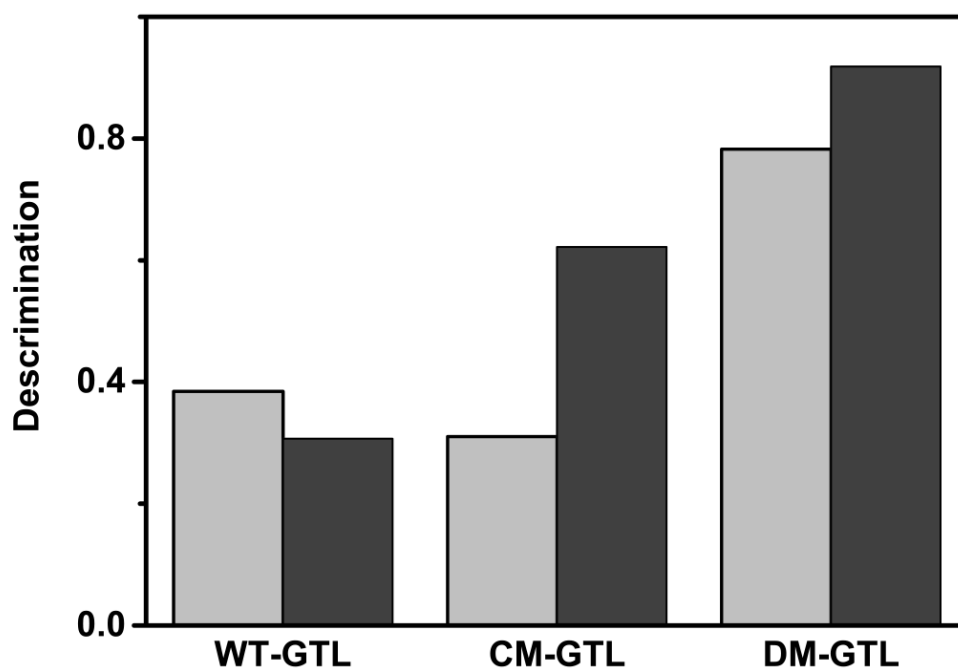

**Figure S3: Fatty acid discrimination of GTL, CM-GTL and DM-GTL at 20 percent hydrolysis.**  
EPA (Light grey) and DHA (Dark).
