# Supplementary material for: Substrate structure and computation guided engineering of a lipase for omega-3 fatty acid selectivity
Source: PubMed Central journal article supplement (PMC7145112; doi:10.1371/journal.pone.0231177), 2020-04-09
Supplement: pone.0231177.s005.pdf [file pone.0231177.s005.pdf]

| Amino acid position | Forward primer                               | Reverse primer                       |
|---------------------|----------------------------------------------|--------------------------------------|
| 170                 | TGACGGGACGACG <b>N</b> KGT<br>CAACATGGTTG    | CAACCATGTTGACMNNCGT<br>CGTCCCGTCA    |
| 171                 | GGACGACGCTT <b>N</b> KAACA<br>TGGTTGATTTC    | GAAATCAACCATGTTMNA<br>AGCGTCGTCC     |
| 244                 | ATACCGCCCGCTACGAT <b>N</b><br>NKTCCGTTCCC    | GGGAACGGAMNNATCGTA<br>GCGGGCGGTAT    |
| 319                 | GAACGACGGC <b>N</b> KGTCA<br>ATACCATTTCGA    | TCGAAATGGTATTGACMNN<br>GCCGTCGTTC    |
| 358                 | GTCGAC <b>N</b> KTTGGAAATC<br>ATCGGCGTTGACCC | GGGTCAACGCCGATGATTT<br>CCAAMNNGTCGAC |
| 359                 | AATGTGACCAT <b>N</b> KGAA<br>ATCATCGGCGT     | ACGCCGATGATTTMNNAT<br>GGTCGACATT     |

| Amino acid position | Forward primer                            | Reverse primer                   |
|---------------------|-------------------------------------------|----------------------------------|
| 170 and 171         | GACGGGACGACGG <b>G</b> TTG<br>GAACATGGTTG | CAACCATGTTCCAACCCGT<br>CGTCCCGTC |
| 359                 | GTCGACCATT <b>G</b> TGAAATC<br>ATCGGCG    | CGCCGATGATTTACAATG<br>GTCGAC     |
| 171                 | GGACGACGCTTCTCAACA<br>T                   | ATGTTGAGAAGCGTCGTCC              |
| 183                 | GCTTTTTTGACTT <b>C</b> ATGA<br>AAGCG      | CGCTTTCATGAAGTCAAAA<br>AAGC      |

**Table S1: Primers used in SSM (Top) and for SDM (Bottom).**  
Mutations are shown in bold.
