# Supplementary material for: Substrate structure and computation guided engineering of a lipase for omega-3 fatty acid selectivity
Source: PubMed Central journal article supplement (PMC7145112; doi:10.1371/journal.pone.0231177), 2020-04-09
Supplement: pone.0231177.s006.pdf [file pone.0231177.s006.pdf]

| Plate D anchovy oil score   |   |   |   |   |   |   |   |   |   |    |    |    |   |   |   |   |    |   |
|-----------------------------|---|---|---|---|---|---|---|---|---|----|----|----|---|---|---|---|----|---|
|                             | 1 | 2 | 3 | 4 | 5 | 6 | 7 | 8 | 9 | 10 | 11 | 12 |   |   |   |   |    |   |
| A                           | 2 | 2 | 2 | 2 | 2 | 2 | 2 | 2 | 1 | 2  | 2  | 3  | A | 1 | 1 | 2 | 0  | 1 |
| B                           |   |   |   |   |   |   |   | 2 | 2 | 1  | 1  | 0  | B | 1 | 1 | 2 | 2  |   |
| C                           |   |   |   |   |   |   |   |   |   |    |    |    | C | 1 | 2 | 1 | 2  |   |
| D                           |   |   |   |   |   |   |   |   |   |    |    |    | D | 2 | 2 | 2 | 2  |   |
| E                           |   |   |   |   |   |   |   |   |   |    |    |    | E | 1 | 2 | 1 | 2  |   |
| F                           |   |   |   |   |   |   |   |   |   |    |    |    | F |   |   |   |    |   |
| G                           |   |   |   |   |   |   |   |   |   |    |    |    | G |   |   |   |    |   |
| H                           |   |   |   |   |   |   |   |   |   |    |    |    | H |   |   |   |    |   |
| Plate D coconut oil score   |   |   |   |   |   |   |   |   |   |    |    |    |   |   |   |   |    |   |
|                             | 1 | 2 | 3 | 4 | 5 | 6 | 7 | 8 | 9 | 10 | 11 | 12 |   |   |   |   |    |   |
| A                           | 2 | 2 | 2 | 2 | 2 | 2 | 2 | 2 | 3 | 2  | 2  | 2  | A | 1 | 2 | 0 | 2  |   |
| B                           |   |   |   |   |   |   |   | 2 | 2 | 0  | 2  | 1  | B | 1 | 1 | 2 | 2  |   |
| C                           |   |   |   |   |   |   |   |   |   |    |    |    | C | 1 | 2 | 1 | 2  |   |
| D                           |   |   |   |   |   |   |   |   |   |    |    |    | D | 2 | 2 | 2 | 2  |   |
| E                           |   |   |   |   |   |   |   |   |   |    |    |    | E | 1 | 2 | 1 | 1  |   |
| F                           |   |   |   |   |   |   |   |   |   |    |    |    | F |   |   |   |    |   |
| G                           |   |   |   |   |   |   |   |   |   |    |    |    | G |   |   |   |    |   |
| H                           |   |   |   |   |   |   |   |   |   |    |    |    | H |   |   |   |    |   |
| Plate D difference in score |   |   |   |   |   |   |   |   |   |    |    |    |   |   |   |   |    |   |
|                             | 1 | 2 | 3 | 4 | 5 | 6 | 7 | 8 | 9 | 10 | 11 | 12 |   |   |   |   |    |   |
| A                           | 0 | 0 | 0 | 0 | 0 | 0 | 0 | 0 | 2 | 0  | 0  | -1 | A | 0 | 1 | 0 | 1  |   |
| B                           | 0 | 0 | 0 | 0 | 0 | 0 | 0 | 0 | 0 | -1 | 1  | 1  | B | 0 | 0 | 0 | 0  |   |
| C                           |   |   |   |   |   |   |   |   |   |    |    |    | C | 0 | 0 | 0 | 0  |   |
| D                           |   |   |   |   |   |   |   |   |   |    |    |    | D | 0 | 0 | 0 | 0  |   |
| E                           |   |   |   |   |   |   |   |   |   |    |    |    | E | 0 | 0 | 0 | -1 |   |
| F                           |   |   |   |   |   |   |   |   |   |    |    |    | F | 0 | 0 | 0 | 0  |   |
| G                           |   |   |   |   |   |   |   |   |   |    |    |    | G |   |   |   |    |   |
| H                           |   |   |   |   |   |   |   |   |   |    |    |    | H |   |   |   |    |   |

**Table S2: Activity of GTL mutants on anchovy and coconut oil.**

Mutants showing improved difference in activity (>2) are sequenced and the mutations were identified.
